# Supplementary material for: Mechanistic insights into the C–H activation of methane mediated by the unsupported and silica-supported VO2OH and CrOOH: a DFT study
Source: Royal Society of Chemistry journal article supplement (doi:10.1039/d0ra10785a), 2021-01-01
Supplement: d0ra10785a1.pdf [file d0ra10785a1.pdf]

## Supporting Information

# Mechanistic insights into the C-H activation of methane mediated by the unsupported and silica-supported/ VO<sub>2</sub>OH and CrOOH: A DFT Study

Shidong Zhao<sup>†1</sup>, Lishuang Ma<sup>†1</sup>, Yanyan Xi,<sup>2,3</sup> Hongyan Shang,<sup>1,3\*</sup> Xufeng Lin<sup>1,3\*</sup>

### Table of Contents:

1. Symmetry-Adapted Perturbation Theory (SAPT) Energy Decomposition Analyses
2. Hirshfeld Spin Density and Charge Population Analyses
3. Schematic illustration of the mixed basis sets used in the Si<sub>16</sub>O<sub>30</sub>H<sub>3</sub> supported system
4. Cartesian Coordinates of All Optimized Structures

## 1. The symmetry-adapted perturbation theory (SAPT) energy decomposition analyses

**Table S1** The SAPT energy decomposition analyses of the complexes (**EC-i** ~ **EC-iv**) of methane molecule with unsupported/ silica-supported VO<sub>2</sub>OH and CrOOH clusters in the reactions Rxn.i ~ Rxn.iv.

| <b>complexes</b>    | $E_{\text{tot}}$<br>kcal/mol | $E_{\text{els}}$<br>kcal/mol | $E_{\text{exc}}$<br>kcal/mol | $E_{\text{ind}}$<br>kcal/mol | $E_{\text{dis}}$<br>kcal/mol |
|---------------------|------------------------------|------------------------------|------------------------------|------------------------------|------------------------------|
| <sup>1</sup> EC-i   | -9.78                        | -16.68                       | 25.16                        | -18.26                       | -8.84                        |
| <sup>1</sup> EC-ii  | -11.13                       | -18.16                       | 27.57                        | -20.54                       | -10.01                       |
| <sup>4</sup> EC-iii | -7.60                        | -4.44                        | 4.25                         | -2.64                        | -4.76                        |
| <sup>4</sup> EC-iv  | -10.12                       | -8.11                        | 11.65                        | -3.47                        | -10.18                       |

## 2. Hirshfeld Spin Density and Charge Population Analyses

**Table S2** Hirshfeld Spin Density and Charge Evolution along the Reaction Coordinates in the PCET and HAT Pathways of C-H Bond Activation of CH<sub>4</sub> on an Unsupported/ Silica-Supported VO<sub>3</sub>H Cluster.

| CH <sub>4</sub> +VO <sub>2</sub> OH    |                 | <sup>1</sup> EC-i  | <sup>1</sup> TS <sub>HAT</sub> -i  | <sup>3</sup> TS <sub>HAT</sub> -i  | <sup>1</sup> P <sub>HAT</sub> -i  | <sup>1</sup> TS <sub>PCET</sub> -i  | <sup>1</sup> P <sub>PCET</sub> -i  |
|----------------------------------------|-----------------|--------------------|------------------------------------|------------------------------------|-----------------------------------|-------------------------------------|------------------------------------|
| <b>spin density</b>                    | V               | 0.00               | 0.85                               | 1.04                               | 1.07                              | 0.00                                | 0.00                               |
|                                        | O <sub>t</sub>  | 0.00               | -0.25                              | 0.56                               | 0.02                              | 0.00                                | 0.00                               |
|                                        | C               | 0.00               | -0.39                              | 0.30                               | 0.77                              | 0.00                                | 0.00                               |
|                                        | H <sub>tr</sub> | 0.00               | -0.05                              | 0.05                               | 0.04                              | 0.00                                | 0.00                               |
| <b>charge</b>                          | V               | 0.58               | 0.63                               | 0.58                               | 0.60                              | 0.59                                | 0.59                               |
|                                        | O <sub>t</sub>  | -0.32              | -0.31                              | -0.25                              | -0.33                             | -0.29                               | -0.31                              |
|                                        | C               | -0.09              | -0.08                              | -0.08                              | -0.08                             | -0.17                               | -0.21                              |
|                                        | H <sub>tr</sub> | 0.07               | 0.08                               | 0.05                               | 0.14                              | 0.10                                | 0.18                               |
| CH <sub>4</sub> +VO <sub>3</sub> @Sili |                 | <sup>1</sup> EC-ii | <sup>1</sup> TS <sub>HAT</sub> -ii | <sup>3</sup> TS <sub>HAT</sub> -ii | <sup>1</sup> P <sub>HAT</sub> -ii | <sup>1</sup> TS <sub>PCET</sub> -ii | <sup>1</sup> P <sub>PCET</sub> -ii |
| <b>spin density</b>                    | V               | 0.00               | 0.89                               | 1.04                               | 1.08                              | 0.00                                | 0.00                               |
|                                        | O <sub>t</sub>  | 0.00               | -0.29                              | 0.58                               | 0.03                              | 0.00                                | 0.00                               |
|                                        | C               | 0.00               | -0.40                              | 0.28                               | 0.76                              | 0.00                                | 0.00                               |
|                                        | H <sub>tr</sub> | 0.00               | -0.05                              | 0.05                               | 0.04                              | 0.00                                | 0.00                               |
| <b>charge</b>                          | V               | 0.59               | 0.74                               | 0.62                               | 0.64                              | 0.60                                | 0.60                               |
|                                        | O <sub>t</sub>  | -0.30              | -0.27                              | -0.24                              | -0.33                             | -0.28                               | -0.30                              |
|                                        | C               | -0.09              | -0.14                              | -0.08                              | -0.08                             | -0.16                               | -0.20                              |
|                                        | H <sub>tr</sub> | 0.07               | 0.06                               | 0.05                               | 0.14                              | 0.11                                | 0.19                               |

V, the metal center; C, the Methane carbon atom; O<sub>t</sub>, the terminal oxygen atom abstracting hydrogen atom; H<sub>tr</sub>, the transferring hydrogen.

**Table S3** Hirshfeld Spin density and Charge Evolution along the Reaction Coordinates in the PCET and HAT Pathways of C-H Bond Activation of CH<sub>4</sub> on an Unsupported/ Silica-Supported CrOOH Cluster.

| CH <sub>4</sub> +CrOOH                  |                 | <sup>4</sup> EC-iii | <sup>4</sup> TS <sub>HAT</sub> -iii | <sup>6</sup> TS <sub>HAT</sub> -iii | <sup>4</sup> P <sub>HAT</sub> -iii | <sup>4</sup> TS <sub>PCET</sub> -iii | <sup>4</sup> P <sub>PCET</sub> -iii |
|-----------------------------------------|-----------------|---------------------|-------------------------------------|-------------------------------------|------------------------------------|--------------------------------------|-------------------------------------|
| <b>spin density</b>                     | Cr              | 3.18                | 3.82                                | 3.98                                | 3.94                               | 2.99                                 | 3.01                                |
|                                         | O <sub>t</sub>  | -0.21               | -0.28                               | 0.63                                | -0.03                              | -0.04                                | 0.00                                |
|                                         | C               | 0.01                | -0.45                               | 0.27                                | -0.76                              | -0.01                                | -0.05                               |
|                                         | H <sub>tr</sub> | 0.00                | -0.03                               | 0.04                                | -0.02                              | 0.02                                 | 0.01                                |
| <b>charge</b>                           | Cr              | 0.56                | 0.52                                | 0.52                                | 0.52                               | 0.60                                 | 0.61                                |
|                                         | O <sub>t</sub>  | -0.36               | -0.36                               | -0.33                               | -0.41                              | -0.38                                | -0.37                               |
|                                         | C               | -0.15               | -0.11                               | -0.11                               | -0.08                              | -0.19                                | -0.26                               |
|                                         | H <sub>tr</sub> | 0.04                | 0.06                                | 0.03                                | 0.10                               | 0.07                                 | 0.15                                |
| CH <sub>4</sub> +CrO <sub>2</sub> @Sili |                 | <sup>4</sup> EC-iv  | <sup>4</sup> TS <sub>HAT</sub> -iv  | <sup>6</sup> TS <sub>HAT</sub> -iv  | <sup>4</sup> P <sub>HAT</sub> -iv  | <sup>4</sup> TS <sub>PCET</sub> -iv  | <sup>4</sup> P <sub>PCET</sub> -iv  |
| <b>spin density</b>                     | Cr              | 3.21                | 3.82                                | 3.94                                | 3.90                               | 3.01                                 | 3.00                                |
|                                         | O <sub>t</sub>  | -0.25               | -0.30                               | 0.65                                | -0.01                              | 0.03                                 | 0.00                                |
|                                         | C               | 0.01                | -0.45                               | 0.25                                | -0.78                              | -0.02                                | -0.06                               |
|                                         | H <sub>tr</sub> | 0.00                | -0.03                               | 0.05                                | -0.01                              | 0.02                                 | 0.01                                |
| <b>charge</b>                           | Cr              | 0.62                | 0.59                                | 0.59                                | 0.60                               | 0.65                                 | 0.65                                |
|                                         | O <sub>t</sub>  | -0.32               | -0.34                               | -0.31                               | -0.39                              | -0.36                                | -0.35                               |
|                                         | C               | -0.15               | -0.10                               | -0.11                               | -0.10                              | -0.18                                | -0.24                               |
|                                         | H <sub>tr</sub> | 0.04                | 0.07                                | 0.03                                | 0.13                               | 0.07                                 | 0.16                                |

Cr, the metal center; C, the Methane carbon atom; O<sub>t</sub>, the terminal oxygen atom abstracting hydrogen atom; H<sub>tr</sub>, the transferring hydrogen.

### 3. Schematic illustration of the mixed basis sets used in the $\text{Si}_{16}\text{O}_{30}\text{H}_3$ supported system

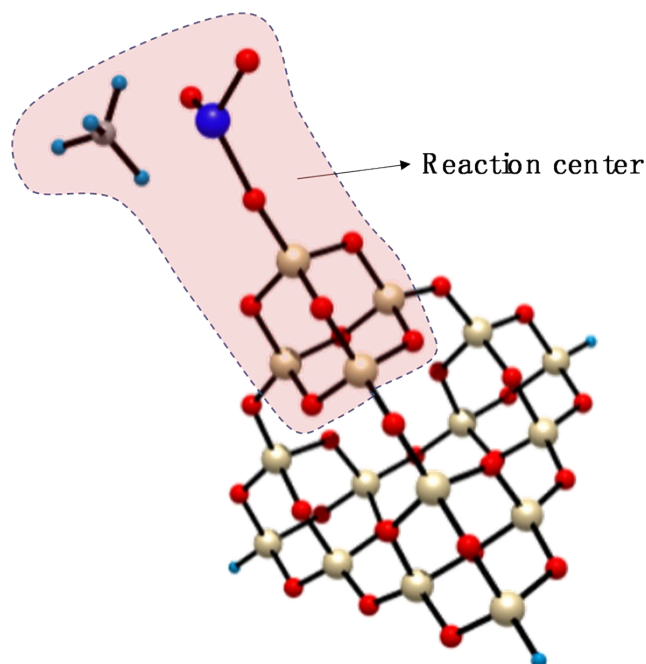

**Figure S1.** Schematic illustration of the mixed basis sets used in the  $\text{Si}_{16}\text{O}_{30}\text{H}_3$  supported system in Rxn.v. The energy-consistent scalar-relativistic DF-adjusted 10-electron-core pseudopotential/ECP10MDF(8s7p6d1f/6s5p3d1f) basis set was used for V, and the def-TZVP basis set was applied for the C, H, O and Si atoms in the reaction center, while the smaller def-SV basis set was applied for all other atoms away from the reaction center (BSI), for the geometry optimization and frequency calculations. Then, the electronic energies were refined with the B3LYP-D3 functional and a larger mixed basis set (BSII), in which the DF-adjusted 10-electron-core pseudopotential/ECP10MDF(8s7p6d2f1g)/[6s5p3d2f1g] was used for V, and the ma-def2-TZVPP basis set was used for the other atoms in the reaction center, while the def-SV basis set was used for that away from the reaction center.

#### 4. Cartesian Coordinates of All Optimized Structures

##### CH<sub>4</sub>

5

---

|   |             |              |              |
|---|-------------|--------------|--------------|
| C | 2.139676000 | -0.589399000 | -0.689358000 |
| H | 3.103244000 | -0.461090000 | -0.196084000 |
| H | 2.283814000 | -1.116609000 | -1.632418000 |
| H | 1.697320000 | 0.387676000  | -0.882622000 |
| H | 1.477306000 | -1.169032000 | -0.046561000 |

No imaginary frequency

G(298.15 K) = -40.51432 a.u.

---

##### VO<sub>3</sub>H

5

---

|   |              |              |              |
|---|--------------|--------------|--------------|
| V | 0.498331000  | -0.220772000 | -0.021694000 |
| O | -0.237378000 | 0.726300000  | -1.342921000 |
| O | -0.114978000 | -1.649483000 | 0.291901000  |
| O | 0.845379000  | 0.585096000  | 1.300930000  |
| H | -0.902442000 | 0.408341000  | -1.965177000 |

No imaginary frequency

G(298.15 K) = -298.16322 a.u.

---

##### VO<sub>3</sub>@Sili

17

---

|    |              |              |              |
|----|--------------|--------------|--------------|
| Si | 0.809971000  | -3.370670000 | -0.687890000 |
| H  | 1.592118000  | -4.600627000 | -0.723471000 |
| O  | 1.516420000  | -2.086915000 | 0.217997000  |
| O  | -0.759861000 | -3.515664000 | -0.001567000 |
| O  | 0.511579000  | -2.644125000 | -2.218112000 |
| Si | 0.715918000  | -0.585851000 | 0.356470000  |
| O  | -0.834630000 | -0.993768000 | 0.945871000  |
| O  | 0.437069000  | -0.123378000 | -1.267140000 |
| Si | -0.392715000 | -1.186285000 | -2.339828000 |
| H  | -0.571500000 | -0.675350000 | -3.693794000 |
| O  | -1.844219000 | -1.544091000 | -1.491058000 |
| Si | -1.802395000 | -2.152964000 | 0.116806000  |
| H  | -3.103789000 | -2.412626000 | 0.720441000  |
| V  | 1.653072000  | 2.061239000  | 2.183641000  |
| O  | 1.503297000  | 0.543164000  | 1.245366000  |
| O  | 0.484461000  | 3.121374000  | 2.085818000  |
| O  | 2.182590000  | 1.951525000  | 3.670331000  |

No imaginary frequency

G(298.15 K) = -1909.62198 a.u.

---

**VO<sub>3</sub>@Sili2**

53

---

|    |             |             |             |
|----|-------------|-------------|-------------|
| Si | -2.35635200 | 0.04325200  | 1.42092000  |
| O  | -4.00229500 | 0.14410100  | 1.22469200  |
| O  | -1.88095700 | -1.24048500 | 0.48303600  |
| O  | -1.74504600 | 1.40682800  | 0.69933200  |
| Si | -4.52363500 | 0.30229300  | -0.36324400 |
| O  | -3.89790300 | -1.01204100 | -1.20517900 |
| O  | -3.76047700 | 1.66201200  | -0.98613400 |
| Si | -2.10223600 | 1.64236800  | -0.90332800 |
| O  | -1.64087900 | 0.26190800  | -1.70024700 |
| Si | -2.24685500 | -1.17523300 | -1.13372100 |
| Si | -0.09911800 | -0.22969800 | 3.33431600  |
| O  | 0.45163800  | -0.38853100 | 4.94001700  |
| O  | 0.77095900  | 1.11761700  | 2.77428500  |
| O  | 0.63167400  | -1.55159100 | 2.55690500  |
| Si | 2.15272600  | -0.50169000 | 5.25530700  |
| O  | 2.81024700  | 0.89888400  | 4.46887600  |
| O  | 2.67006100  | -1.81667300 | 4.24768400  |
| Si | 2.31539300  | -1.78381500 | 2.58261200  |
| O  | 2.94623300  | -0.28475100 | 2.08837000  |
| Si | 2.46890700  | 1.17160500  | 2.82350400  |
| H  | 2.50714200  | -0.63512000 | 6.66042000  |
| O  | -1.71016200 | -0.11255800 | 2.92071200  |
| O  | -1.23198900 | 2.91233600  | -1.47039100 |
| O  | 3.03255200  | 2.48001500  | 1.95870300  |
| O  | 2.75022700  | -2.98311200 | 1.51035100  |
| O  | -1.50599800 | -2.41751300 | -1.90880300 |
| Si | 0.12543500  | -2.75862100 | -1.96592600 |
| O  | 0.75887100  | -2.95979700 | -0.40283800 |
| O  | 0.99755700  | -1.44881600 | -2.60602600 |
| O  | 0.77884600  | -4.08851800 | -2.80947500 |
| Si | 2.43164900  | -3.07192300 | -0.12261100 |
| O  | 3.07481900  | -1.72591800 | -0.93735400 |
| O  | 2.89769200  | -4.37476400 | -1.11522000 |
| Si | 2.49339700  | -4.34777000 | -2.80255000 |
| O  | 3.14048200  | -2.83532300 | -3.35574900 |
| Si | 2.69581900  | -1.39655900 | -2.56100100 |
| Si | 2.94930000  | 4.54530400  | -2.07481500 |
| O  | 1.21751500  | 4.46443700  | -2.10771500 |
| O  | 3.34133200  | 4.25962400  | -0.40853700 |
| O  | 3.44251400  | 3.08356800  | -2.87020500 |
| Si | 0.42598200  | 3.08985700  | -1.48236300 |
| O  | 1.06491000  | 2.97335700  | 0.08688700  |

---

---

|    |             |             |             |
|----|-------------|-------------|-------------|
| O  | 1.16430100  | 1.81667800  | -2.33031300 |
| Si | 2.84870200  | 1.58822700  | -2.31286000 |
| O  | 3.24945500  | 1.61253000  | -0.66116600 |
| Si | 2.73841500  | 2.86750600  | 0.36512700  |
| O  | 3.23873700  | 0.11823000  | -2.99398100 |
| H  | 3.51622500  | 5.76376700  | -2.63307200 |
| H  | 2.93887700  | -5.51093700 | -3.55509400 |
| V  | -7.86871000 | 0.01048400  | -0.21244000 |
| O  | -6.13198200 | 0.39329800  | -0.48301500 |
| O  | -8.74841400 | 1.10728500  | 0.50917400  |
| O  | -8.22792900 | -1.42860100 | 0.33116400  |

No imaginary frequency

G(298.15 K) = -7187.565240 a.u.

---

### CrO<sub>2</sub>H

4

---

|    |              |             |              |
|----|--------------|-------------|--------------|
| Cr | -4.089916000 | 1.042072000 | -0.212874000 |
| O  | -2.575625000 | 0.648514000 | 0.092937000  |
| O  | -5.786236000 | 0.635268000 | 0.103007000  |
| H  | -6.366214000 | 0.032432000 | 0.572680000  |

No imaginary frequency

G(298.15 K) = -238.1602220 a.u.

---

### CrO<sub>2</sub>@Sili

16

---

|    |              |              |              |
|----|--------------|--------------|--------------|
| Si | -2.190710000 | 1.488863000  | 0.019504000  |
| H  | -2.912963000 | 2.757763000  | 0.035549000  |
| O  | -2.533373000 | 0.520382000  | 1.343822000  |
| O  | -0.526801000 | 1.680040000  | 0.018546000  |
| O  | -2.538320000 | 0.551645000  | -1.325878000 |
| Si | -1.747561000 | -0.958848000 | 1.416632000  |
| H  | -2.098390000 | -1.736909000 | 2.601235000  |
| O  | -0.113038000 | -0.604514000 | 1.322540000  |
| O  | -2.123302000 | -1.738646000 | -0.018722000 |
| Si | -1.752776000 | -0.925275000 | -1.436685000 |
| H  | -2.108005000 | -1.675483000 | -2.637843000 |
| O  | -0.117870000 | -0.573345000 | -1.340283000 |
| Si | 0.394684000  | 0.285880000  | 0.000464000  |
| Cr | 3.755371000  | 0.249718000  | -0.000508000 |
| O  | 4.862054000  | -0.893593000 | 0.000975000  |
| O  | 1.983090000  | 0.582118000  | 0.000805000  |

No imaginary frequency

G(298.15 K) = -1890.1501494 a.u.

---



**<sup>1</sup>EC-i**

10

---

|   |              |              |              |
|---|--------------|--------------|--------------|
| V | 0.539939000  | -0.225256000 | -0.036921000 |
| O | -0.227105000 | 0.731492000  | -1.338960000 |
| O | -0.141154000 | -1.630796000 | 0.265575000  |
| O | 0.824160000  | 0.593994000  | 1.299946000  |
| H | 2.649132000  | -0.214998000 | -0.054742000 |
| H | -0.906928000 | 0.380048000  | -1.926601000 |
| C | 2.738816000  | -0.790017000 | -0.995625000 |
| H | 1.890618000  | -1.428547000 | -1.283624000 |
| H | 3.554462000  | -1.482251000 | -0.802173000 |
| H | 2.975143000  | -0.105531000 | -1.804745000 |

No imaginary frequency

G(298.15 K) = -338.68310 a.u.

**<sup>1</sup>TS<sub>HAT-i</sub>**

10

---

|   |              |              |              |
|---|--------------|--------------|--------------|
| V | -0.677181000 | -0.440517000 | 0.604143000  |
| O | -1.402990000 | 0.536102000  | -0.710357000 |
| O | -1.547049000 | -1.548281000 | 1.324563000  |
| O | 1.003377000  | -0.717476000 | 0.623084000  |
| H | 1.989351000  | -1.127839000 | 0.093213000  |
| H | -2.304686000 | 0.519153000  | -1.047962000 |
| C | 3.050005000  | -1.603818000 | -0.556100000 |
| H | 2.983111000  | -2.673775000 | -0.384170000 |
| H | 3.879752000  | -1.111334000 | -0.057773000 |
| H | 2.885033000  | -1.293433000 | -1.583272000 |

One and only one imaginary frequency: -2024.5411 cm<sup>-1</sup>

G(298.15 K) = -338.62437 a.u.

**<sup>3</sup>TS<sub>HAT-i</sub>**

10

---

|   |              |              |              |
|---|--------------|--------------|--------------|
| V | -0.297922000 | -0.106068000 | 0.611961000  |
| O | -0.944065000 | -1.198495000 | -0.644819000 |
| O | -1.250743000 | 0.794776000  | 1.490400000  |
| O | 1.451144000  | 0.045449000  | 0.953599000  |
| H | 2.152310000  | -0.775905000 | 0.134383000  |
| H | -1.832061000 | -1.398633000 | -0.956917000 |
| C | 2.567489000  | -1.567988000 | -0.679912000 |
| H | 3.225645000  | -0.980391000 | -1.315038000 |
| H | 1.697850000  | -1.958942000 | -1.201405000 |
| H | 3.089076000  | -2.315021000 | -0.086882000 |

One and only one imaginary frequency: -697.6984 cm<sup>-1</sup>

---

G(298.15 K) = -338.61753 a.u.

---

**<sup>1</sup>TS<sub>PCET-i</sub>**

10

---

|   |              |              |              |
|---|--------------|--------------|--------------|
| V | -0.677181000 | -0.440517000 | 0.604143000  |
| O | -1.402990000 | 0.536102000  | -0.710357000 |
| O | -1.547049000 | -1.548281000 | 1.324563000  |
| O | 1.003377000  | -0.717476000 | 0.623084000  |
| H | 1.989351000  | -1.127839000 | 0.093213000  |
| H | -2.304686000 | 0.519153000  | -1.047962000 |
| C | 3.050005000  | -1.603818000 | -0.556100000 |
| H | 2.983111000  | -2.673775000 | -0.384170000 |
| H | 3.879752000  | -1.111334000 | -0.057773000 |
| H | 2.885033000  | -1.293433000 | -1.583272000 |

One and only one imaginary frequency: -2024.5541 cm<sup>-1</sup>

G(298.15 K) = -338.65123 a.u.

---

**<sup>1</sup>P<sub>HAT-i</sub>**

10

---

|   |              |              |              |
|---|--------------|--------------|--------------|
| V | -0.241835000 | 0.231601000  | -0.350760000 |
| O | -1.779891000 | 1.127221000  | -0.262134000 |
| O | -0.232995000 | -1.343518000 | -0.217870000 |
| O | 1.318401000  | 1.038701000  | -0.610754000 |
| H | 2.175480000  | 0.586509000  | -0.678964000 |
| H | -2.689110000 | 0.835296000  | -0.140759000 |
| C | 3.342531000  | -1.391639000 | -0.680897000 |
| H | 2.363918000  | -1.819330000 | -0.511198000 |
| H | 3.991341000  | -1.179980000 | 0.156893000  |
| H | 3.731552000  | -1.318205000 | -1.686357000 |

No imaginary frequency

G(298.15 K) = -338.64456 a.u.

---

**<sup>1</sup>P<sub>PCET-i</sub>**

10

---

|   |              |              |              |
|---|--------------|--------------|--------------|
| V | -0.068796000 | -0.017361000 | 0.039003000  |
| O | -1.047117000 | -1.117979000 | -0.944925000 |
| O | -0.102657000 | -0.439311000 | 1.547872000  |
| O | -0.353106000 | 1.700086000  | -0.219419000 |
| H | -0.523928000 | 2.364548000  | 0.458035000  |
| C | 1.846765000  | -0.340883000 | -0.517668000 |
| H | 2.503239000  | 0.268088000  | 0.106943000  |
| H | 2.081874000  | -1.397868000 | -0.383217000 |
| H | 1.951526000  | -0.054701000 | -1.567357000 |
| H | -1.338359000 | -0.879148000 | -1.834342000 |

---

---

No imaginary frequency  
G(298.15 K) =-338.64456 a.u.

---

**<sup>1</sup>EC-ii**

22

---

|    |              |              |              |
|----|--------------|--------------|--------------|
| Si | 0.728649000  | -3.325677000 | -0.731913000 |
| H  | 1.466740000  | -4.576315000 | -0.879474000 |
| O  | 1.467807000  | -2.245674000 | 0.315245000  |
| O  | -0.824855000 | -3.537741000 | -0.142462000 |
| O  | 0.550969000  | -2.492645000 | -2.177253000 |
| Si | 0.701027000  | -0.785364000 | 0.557438000  |
| O  | -0.842170000 | -1.157853000 | 1.062723000  |
| O  | 0.530481000  | -0.110224000 | -0.975737000 |
| Si | -0.281752000 | -1.040539000 | -2.112684000 |
| H  | -0.388988000 | -0.381423000 | -3.411680000 |
| O  | -1.766364000 | -1.396989000 | -1.427675000 |
| Si | -1.748349000 | -2.154760000 | 0.068323000  |
| H  | -3.083757000 | -2.428586000 | 0.589337000  |
| V  | 1.552437000  | 2.003931000  | 1.875822000  |
| O  | 1.511330000  | 0.228913000  | 1.523098000  |
| O  | 0.158377000  | 2.756120000  | 1.816027000  |
| O  | 2.365803000  | 2.429815000  | 3.170746000  |
| H  | 2.792689000  | 3.320140000  | 0.914976000  |
| C  | 2.668636000  | 2.904698000  | -0.106262000 |
| H  | 1.881608000  | 2.159226000  | -0.290030000 |
| H  | 3.624235000  | 2.470510000  | -0.386278000 |
| H  | 2.413279000  | 3.764371000  | -0.719709000 |

No imaginary frequency  
G(298.15 K) =-1950.17649 a.u.

---

**<sup>1</sup>TS<sub>HAT</sub>-ii**

22

---

|    |             |              |              |
|----|-------------|--------------|--------------|
| Si | 4.438638000 | -3.658580000 | -1.213073000 |
| H  | 5.837971000 | -3.974175000 | -0.937636000 |
| O  | 4.002137000 | -2.132514000 | -0.670228000 |
| O  | 3.367851000 | -4.719208000 | -0.482444000 |
| O  | 4.064512000 | -3.683773000 | -2.844545000 |
| Si | 2.409205000 | -1.665349000 | -0.934066000 |
| O  | 1.476056000 | -2.857323000 | -0.225973000 |
| O  | 2.171851000 | -1.823683000 | -2.578448000 |
| Si | 2.479008000 | -3.322221000 | -3.257510000 |
| H  | 2.237974000 | -3.363314000 | -4.696567000 |
| O  | 1.534630000 | -4.409030000 | -2.398880000 |
| Si | 1.734631000 | -4.431231000 | -0.735659000 |

---

---

|   |             |              |              |
|---|-------------|--------------|--------------|
| H | 0.872885000 | -5.400493000 | -0.065209000 |
| V | 2.544918000 | 1.370523000  | 0.442138000  |
| O | 2.094227000 | -0.191649000 | -0.358802000 |
| O | 2.270660000 | 2.728899000  | -0.310559000 |
| O | 3.972024000 | 1.362472000  | 1.378608000  |
| H | 4.995153000 | 0.714936000  | 1.417400000  |
| C | 6.048314000 | -0.068411000 | 1.330574000  |
| H | 5.684418000 | -0.861946000 | 0.684340000  |
| H | 6.231027000 | -0.354802000 | 2.362146000  |
| H | 6.803105000 | 0.579137000  | 0.894752000  |

One and only one imaginary frequency: -1853.9755 cm<sup>-1</sup>

G(298.15 K) = -1950.10137 a.u.

---

**<sup>3</sup>TS<sub>HAT-ii</sub>**

22

---

|    |             |              |              |
|----|-------------|--------------|--------------|
| Si | 4.478294000 | -4.140589000 | -2.277830000 |
| H  | 5.818624000 | -4.657160000 | -2.540699000 |
| O  | 4.492740000 | -2.590067000 | -1.636846000 |
| O  | 3.616140000 | -5.069449000 | -1.183006000 |
| O  | 3.523683000 | -4.051386000 | -3.650506000 |
| Si | 2.999258000 | -1.903905000 | -1.298272000 |
| O  | 2.240074000 | -2.975602000 | -0.268935000 |
| O  | 2.147437000 | -1.960099000 | -2.731583000 |
| Si | 1.965785000 | -3.463379000 | -3.448926000 |
| H  | 1.204126000 | -3.418222000 | -4.693141000 |
| O  | 1.266061000 | -4.438025000 | -2.279234000 |
| Si | 2.065093000 | -4.551696000 | -0.810800000 |
| H  | 1.386697000 | -5.416169000 | 0.149939000  |
| 23 | 3.495057000 | 1.223795000  | -0.025133000 |
| O  | 3.150865000 | -0.416980000 | -0.688452000 |
| O  | 2.340657000 | 2.246402000  | 0.290316000  |
| O  | 5.130408000 | 1.834312000  | 0.326709000  |
| H  | 6.064453000 | 0.851717000  | 0.003040000  |
| C  | 6.748556000 | -0.074885000 | -0.319691000 |
| H  | 6.104397000 | -0.830576000 | -0.761968000 |
| H  | 7.214670000 | -0.398244000 | 0.608046000  |
| H  | 7.453771000 | 0.356242000  | -1.026474000 |

One and only one imaginary frequency: -519.0928 cm<sup>-1</sup>

G(298.15 K) = -1950.10137 a.u.

---

**<sup>1</sup>TS<sub>PCET-ii</sub>**

22

---

|    |             |              |              |
|----|-------------|--------------|--------------|
| Si | 2.726231000 | -7.381969000 | -1.359870000 |
| H  | 4.057212000 | -7.948396000 | -1.163286000 |

---

---

|    |              |              |              |
|----|--------------|--------------|--------------|
| O  | 2.430040000  | -6.050368000 | -0.384849000 |
| O  | 1.491925000  | -8.465992000 | -1.025928000 |
| O  | 2.455109000  | -6.859992000 | -2.928804000 |
| Si | 0.934622000  | -5.328043000 | -0.540794000 |
| O  | -0.181113000 | -6.537790000 | -0.251386000 |
| O  | 0.778172000  | -4.935282000 | -2.154539000 |
| Si | 0.954189000  | -6.187797000 | -3.254007000 |
| H  | 0.803525000  | -5.759367000 | -4.641155000 |
| O  | -0.165273000 | -7.347753000 | -2.795340000 |
| Si | -0.075611000 | -7.903814000 | -1.217603000 |
| H  | -1.087743000 | -8.907360000 | -0.901616000 |
| 23 | -0.219521000 | -2.665059000 | 1.020157000  |
| O  | 0.751067000  | -4.049770000 | 0.442478000  |
| O  | -1.689410000 | -2.585983000 | 0.462106000  |
| O  | 0.498768000  | -1.168409000 | 1.126041000  |
| H  | 0.214598000  | -1.588669000 | 2.313212000  |
| C  | -0.321275000 | -2.604833000 | 3.197676000  |
| H  | -1.390760000 | -2.684116000 | 3.380313000  |
| H  | 0.188672000  | -3.552601000 | 3.383364000  |
| H  | 0.086750000  | -1.879141000 | 3.908416000  |

One and only one imaginary frequency: -1501.9830 cm<sup>-1</sup>

G(298.15 K) = -1950.14373 a.u.

---

**<sup>1</sup>P<sub>HAT-ii</sub>**

22

---

|    |              |              |              |
|----|--------------|--------------|--------------|
| Si | 1.264927000  | -2.202770000 | -1.001265000 |
| H  | 2.621278000  | -2.683759000 | -1.248726000 |
| O  | 1.233419000  | -0.667909000 | -0.322700000 |
| O  | 0.401100000  | -3.175526000 | 0.053187000  |
| O  | 0.336334000  | -2.099102000 | -2.390567000 |
| Si | -0.280642000 | -0.020431000 | 0.002427000  |
| O  | -1.036406000 | -1.133661000 | 0.989496000  |
| O  | -1.101373000 | -0.059792000 | -1.449724000 |
| Si | -1.237338000 | -1.548060000 | -2.206545000 |
| H  | -1.974679000 | -1.488104000 | -3.464753000 |
| O  | -1.939392000 | -2.565782000 | -1.075362000 |
| Si | -1.167607000 | -2.698780000 | 0.405985000  |
| H  | -1.846774000 | -3.600583000 | 1.331221000  |
| 23 | 0.178717000  | 3.085793000  | 1.325252000  |
| O  | -0.180376000 | 1.454604000  | 0.649885000  |
| O  | -0.988571000 | 4.087329000  | 1.654876000  |
| O  | 1.824204000  | 3.673987000  | 1.619361000  |
| H  | 2.647187000  | 3.183273000  | 1.449250000  |
| C  | 3.869751000  | 1.411574000  | 0.804941000  |

---

|                                |             |             |             |
|--------------------------------|-------------|-------------|-------------|
| H                              | 3.053900000 | 0.795954000 | 0.451092000 |
| H                              | 4.248646000 | 1.277794000 | 1.808652000 |
| H                              | 4.426313000 | 2.021360000 | 0.106874000 |
| No imaginary frequency         |             |             |             |
| G(298.15 K) = -1950.13664 a.u. |             |             |             |

**<sup>1</sup>P<sub>PCET-ii</sub>**

22

|                                |              |              |              |
|--------------------------------|--------------|--------------|--------------|
| Si                             | 2.130171000  | -2.042228000 | -0.696057000 |
| H                              | 3.473467000  | -2.587898000 | -0.526224000 |
| O                              | 1.871111000  | -0.647986000 | 0.199324000  |
| O                              | 0.922019000  | -3.106214000 | -0.230036000 |
| O                              | 1.780412000  | -1.628852000 | -2.281651000 |
| Si                             | 0.361655000  | 0.050822000  | 0.069550000  |
| O                              | -0.729327000 | -1.139640000 | 0.492947000  |
| O                              | 0.127931000  | 0.335575000  | -1.557071000 |
| Si                             | 0.259501000  | -0.988118000 | -2.577463000 |
| H                              | 0.039238000  | -0.653670000 | -3.981008000 |
| O                              | -0.827029000 | -2.119416000 | -1.988149000 |
| Si                             | -0.657997000 | -2.567784000 | -0.382804000 |
| H                              | -1.645408000 | -3.552538000 | 0.048527000  |
| V                              | -0.800699000 | 2.684241000  | 1.630197000  |
| O                              | 0.222823000  | 1.385153000  | 0.987143000  |
| O                              | -2.228215000 | 2.762235000  | 0.996964000  |
| O                              | -0.079660000 | 4.293692000  | 1.703086000  |
| H                              | 0.861452000  | 4.410595000  | 1.890497000  |
| C                              | -1.163391000 | 2.165460000  | 3.542633000  |
| H                              | -1.804812000 | 2.914473000  | 4.008347000  |
| H                              | -1.666481000 | 1.196032000  | 3.528376000  |
| H                              | -0.205960000 | 2.093506000  | 4.064379000  |
| No imaginary frequency         |              |              |              |
| G(298.15 K) = -1950.19956 a.u. |              |              |              |

**<sup>4</sup>EC-iii**

9

|    |              |              |              |
|----|--------------|--------------|--------------|
| Cr | 0.497534000  | -1.246394000 | 1.480931000  |
| O  | 0.917981000  | -0.111496000 | 2.519751000  |
| O  | -0.873098000 | -2.157206000 | 0.817083000  |
| H  | -1.822813000 | -2.276177000 | 0.881826000  |
| C  | 0.255318000  | 1.156545000  | -1.137400000 |
| H  | 1.215072000  | 0.686785000  | -1.355625000 |
| H  | -0.539213000 | 0.411616000  | -1.191389000 |
| H  | 0.065605000  | 1.937427000  | -1.873672000 |
| H  | 0.283615000  | 1.598902000  | -0.141504000 |

---

No imaginary frequency

G(298.15 K) = -278.6676501 a.u.

---

**<sup>4</sup>TS<sub>HAT-iii</sub>**

9

---

|    |              |              |              |
|----|--------------|--------------|--------------|
| Cr | -4.385191000 | 0.466139000  | 0.309775000  |
| O  | -4.043590000 | 2.174371000  | 0.132289000  |
| O  | -5.570927000 | -0.864851000 | 0.581148000  |
| H  | -6.243081000 | -1.046601000 | 1.242135000  |
| C  | -4.036080000 | 3.301436000  | -2.164374000 |
| H  | -2.999213000 | 3.213450000  | -2.471313000 |
| H  | -4.739791000 | 2.707829000  | -2.738640000 |
| H  | -4.366276000 | 4.308854000  | -1.931583000 |
| H  | -4.042725000 | 2.722046000  | -0.845692000 |

One and only one imaginary frequency: -1529.8357 cm<sup>-1</sup>

G(298.15 K) = -278.6195591 a.u.

---

**<sup>6</sup>TS<sub>HAT-iii</sub>**

9

---

|    |              |              |              |
|----|--------------|--------------|--------------|
| Cr | -4.260465000 | 0.590229000  | 0.452319000  |
| O  | -3.920519000 | 2.412563000  | 0.409092000  |
| O  | -5.508159000 | -0.704049000 | 0.266504000  |
| H  | -6.202859000 | -0.985257000 | 0.868545000  |
| C  | -4.112231000 | 3.138579000  | -2.033449000 |
| H  | -3.182697000 | 2.841983000  | -2.513289000 |
| H  | -4.972712000 | 2.598057000  | -2.420395000 |
| H  | -4.261753000 | 4.216214000  | -2.045263000 |
| H  | -4.005480000 | 2.874352000  | -0.870319000 |

One and only one imaginary frequency: -649.51 cm<sup>-1</sup>

G(298.15 K) = -278.5945501 a.u.

---

**<sup>4</sup>TS<sub>PCET-iii</sub>**

9

---

|    |              |             |              |
|----|--------------|-------------|--------------|
| Cr | -4.058238000 | 0.484923000 | -0.543392000 |
| O  | -2.458232000 | 0.289444000 | -0.053838000 |
| O  | -5.736747000 | 0.298882000 | 0.081867000  |
| H  | -6.288606000 | 0.751938000 | 0.723614000  |
| C  | -3.333114000 | 2.461171000 | -1.250176000 |
| H  | -3.740051000 | 2.352550000 | -2.258948000 |
| H  | -3.972526000 | 3.109748000 | -0.651552000 |
| H  | -2.368210000 | 2.962951000 | -1.365221000 |
| H  | -2.624800000 | 1.501369000 | -0.622064000 |

One and only one imaginary frequency: -1357.6256 cm<sup>-1</sup>

G(298.15 K) = -278.6264446 a.u.

---

**<sup>4</sup>P<sub>HAT-iii</sub>**

9

---

|    |              |              |              |
|----|--------------|--------------|--------------|
| Cr | -0.295558000 | -1.857729000 | 0.766268000  |
| O  | 1.101799000  | -0.875158000 | 0.186810000  |
| O  | -1.641903000 | -2.171324000 | 1.937057000  |
| H  | -1.614092000 | -2.484197000 | 2.845432000  |
| C  | 0.356338000  | 1.819802000  | -1.346931000 |
| H  | 0.953599000  | 2.412166000  | -0.668984000 |
| H  | 0.780633000  | 1.479175000  | -2.280073000 |
| H  | -0.701440000 | 1.701831000  | -1.164103000 |
| H  | 1.060624000  | -0.024566000 | -0.275477000 |

No imaginary frequency

G(298.15 K) = -278.6269120 a.u.

**<sup>6</sup>P<sub>HAT-iii</sub>**

9

---

|    |              |              |              |
|----|--------------|--------------|--------------|
| Cr | -0.190824000 | -1.956489000 | 0.939030000  |
| O  | 1.022491000  | -0.737074000 | 0.385954000  |
| O  | -1.626585000 | -2.448409000 | 1.929632000  |
| H  | -1.697223000 | -2.625170000 | 2.871756000  |
| C  | 0.400984000  | 1.910849000  | -1.468157000 |
| H  | 1.130519000  | 2.430351000  | -0.864237000 |
| H  | 0.700311000  | 1.454821000  | -2.400366000 |
| H  | -0.644018000 | 1.946774000  | -1.197767000 |
| H  | 0.904345000  | 0.024349000  | -0.195845000 |

No imaginary frequency

G(298.15 K) = -278.6279404 a.u.

**<sup>4</sup>P<sub>PCET-iii</sub>**

9

---

|    |              |              |              |
|----|--------------|--------------|--------------|
| Cr | -0.030861000 | -0.871645000 | -0.035449000 |
| O  | 1.535003000  | -1.359838000 | 0.653886000  |
| O  | -1.699264000 | -1.240389000 | 0.460322000  |
| H  | -2.232971000 | -0.718104000 | 1.068605000  |
| C  | 0.083617000  | 1.009159000  | -0.764349000 |
| H  | -0.763607000 | 1.191624000  | -1.431139000 |
| H  | 0.062146000  | 1.738728000  | 0.048903000  |
| H  | 1.016623000  | 1.123861000  | -1.323041000 |
| H  | 2.029313000  | -0.873396000 | 1.322265000  |

No imaginary frequency

G(298.15 K) = -278.6865972 a.u.

**<sup>4</sup>EC-iv**

21



---

|    |              |              |              |
|----|--------------|--------------|--------------|
| Si | 0.088901000  | -0.546394000 | 2.507689000  |
| H  | 0.376105000  | -0.311237000 | 3.919798000  |
| O  | 0.882139000  | -1.887356000 | 1.889148000  |
| O  | 0.535781000  | 0.734050000  | 1.524895000  |
| O  | -1.538496000 | -0.805474000 | 2.200614000  |
| Si | 0.618215000  | -2.238102000 | 0.271691000  |
| H  | 1.349311000  | -3.415929000 | -0.186879000 |
| O  | 1.029958000  | -0.844823000 | -0.562646000 |
| O  | -1.042746000 | -2.387937000 | 0.108190000  |
| Si | -1.968275000 | -1.080980000 | 0.603898000  |
| H  | -3.401591000 | -1.293184000 | 0.424388000  |
| O  | -1.384267000 | 0.234593000  | -0.251551000 |
| Si | 0.249243000  | 0.568103000  | -0.112981000 |
| Cr | 0.840586000  | 2.869272000  | -2.463728000 |
| O  | 0.321431000  | 3.038841000  | -3.958566000 |
| O  | 0.718712000  | 1.845844000  | -0.980436000 |
| C  | 2.873091000  | 0.175895000  | -3.523406000 |
| H  | 3.517112000  | 1.003953000  | -3.221404000 |
| H  | 2.375821000  | -0.243077000 | -2.649444000 |
| H  | 3.489236000  | -0.590516000 | -3.993711000 |
| H  | 2.133617000  | 0.526312000  | -4.244692000 |

No imaginary frequency

G(298.15 K) = -1890.1501494 a.u.

---

**<sup>4</sup>TS<sub>HAT-iv</sub>**

21

---

|    |              |              |              |
|----|--------------|--------------|--------------|
| Si | 1.202429000  | -2.863164000 | 1.636435000  |
| H  | 1.340222000  | -2.440507000 | 3.028012000  |
| O  | 1.887609000  | -4.364661000 | 1.340163000  |
| O  | 1.924140000  | -1.812018000 | 0.556036000  |
| O  | -0.396440000 | -2.995012000 | 1.149521000  |
| Si | 1.782849000  | -4.932320000 | -0.234187000 |
| H  | 2.406400000  | -6.241887000 | -0.408949000 |
| O  | 2.465729000  | -3.745682000 | -1.192711000 |
| O  | 0.147561000  | -4.934564000 | -0.603960000 |
| Si | -0.653508000 | -3.470568000 | -0.438005000 |
| H  | -2.070467000 | -3.555422000 | -0.783143000 |
| O  | 0.190975000  | -2.380419000 | -1.382136000 |
| Si | 1.831137000  | -2.195861000 | -1.072798000 |
| Cr | 3.141462000  | -0.268447000 | -3.528282000 |
| O  | 3.337647000  | -0.236599000 | -5.260103000 |
| O  | 2.556722000  | -1.127529000 | -2.021304000 |
| C  | 5.477683000  | -1.038734000 | -6.387714000 |
| H  | 6.233927000  | -0.360366000 | -6.006981000 |

---

---

|   |             |              |              |
|---|-------------|--------------|--------------|
| H | 5.561198000 | -2.064862000 | -6.044589000 |
| H | 5.241155000 | -0.922229000 | -7.440707000 |
| H | 4.265967000 | -0.589357000 | -5.811242000 |

One and only one imaginary frequency: -1643.2046 cm<sup>-1</sup>

G(298.15 K) = -1890.0825898 a.u.

---

**<sup>6</sup>TS<sub>HAT-iv</sub>**

21

---

|    |              |              |              |
|----|--------------|--------------|--------------|
| Si | 1.521107000  | -2.659715000 | 1.194952000  |
| H  | 1.631180000  | -2.363225000 | 2.620892000  |
| O  | 2.690633000  | -3.737516000 | 0.660993000  |
| O  | 1.680037000  | -1.305724000 | 0.227651000  |
| O  | 0.051866000  | -3.350867000 | 0.780586000  |
| Si | 2.646746000  | -4.139891000 | -0.964857000 |
| H  | 3.699335000  | -5.077550000 | -1.349840000 |
| O  | 2.733638000  | -2.688480000 | -1.794382000 |
| O  | 1.105949000  | -4.734252000 | -1.244358000 |
| Si | -0.168355000 | -3.720409000 | -0.840042000 |
| H  | -1.474577000 | -4.311743000 | -1.117559000 |
| O  | 0.104015000  | -2.297421000 | -1.671831000 |
| Si | 1.569559000  | -1.522028000 | -1.429436000 |
| Cr | 2.651737000  | 0.457677000  | -3.760177000 |
| O  | 3.093380000  | -0.134952000 | -5.441420000 |
| O  | 1.762853000  | -0.179436000 | -2.284679000 |
| C  | 4.544213000  | -2.194597000 | -4.873971000 |
| H  | 4.379242000  | -2.945746000 | -5.644013000 |
| H  | 5.581304000  | -1.870175000 | -4.825494000 |
| H  | 4.153308000  | -2.501984000 | -3.906167000 |
| H  | 3.917225000  | -1.262173000 | -5.243492000 |

One and only one imaginary frequency: -499.0279cm<sup>-1</sup>

G(298.15 K) = -1890.1064411 a.u.

---

**<sup>4</sup>TS<sub>PCET-iv</sub>**

21

---

|    |              |              |              |
|----|--------------|--------------|--------------|
| Si | 1.543398000  | -2.523884000 | 1.328849000  |
| H  | 1.877623000  | -2.003016000 | 2.651765000  |
| O  | 2.396614000  | -3.915502000 | 0.941686000  |
| O  | 1.862730000  | -1.441514000 | 0.094943000  |
| O  | -0.074613000 | -2.931155000 | 1.172953000  |
| Si | 2.083194000  | -4.590785000 | -0.560003000 |
| H  | 2.867917000  | -5.795611000 | -0.819895000 |
| O  | 2.370588000  | -3.371721000 | -1.671727000 |
| O  | 0.430800000  | -4.863276000 | -0.599103000 |
| Si | -0.553038000 | -3.534363000 | -0.316288000 |

---

---

|    |              |              |              |
|----|--------------|--------------|--------------|
| H  | -1.975921000 | -3.858318000 | -0.370373000 |
| O  | -0.093678000 | -2.386098000 | -1.440335000 |
| Si | 1.516390000  | -1.930313000 | -1.468139000 |
| Cr | 2.747702000  | -0.704380000 | -4.217229000 |
| O  | 2.558891000  | -0.965835000 | -5.863251000 |
| O  | 1.891986000  | -0.846846000 | -2.591108000 |
| C  | 4.354411000  | -2.188622000 | -4.400207000 |
| H  | 5.165270000  | -1.579993000 | -3.993709000 |
| H  | 3.963528000  | -2.872728000 | -3.646237000 |
| H  | 4.786369000  | -2.788804000 | -5.206558000 |
| H  | 3.547452000  | -1.731240000 | -5.399047000 |

One and only one imaginary frequency: -1412.8782 cm-1

G(298.15 K) = -1890.1141454 a.u.

---

**<sup>4</sup>P<sub>HAT-iv</sub>**

21

---

|    |              |              |              |
|----|--------------|--------------|--------------|
| Si | -0.372232000 | -0.535709000 | 2.811280000  |
| H  | -0.291410000 | -0.216888000 | 4.234328000  |
| O  | 0.826266000  | -1.597039000 | 2.310860000  |
| O  | -0.225856000 | 0.804366000  | 1.825755000  |
| O  | -1.819588000 | -1.263782000 | 2.385571000  |
| Si | 0.817884000  | -2.024215000 | 0.691016000  |
| H  | 1.896251000  | -2.944368000 | 0.337585000  |
| O  | 0.882046000  | -0.583890000 | -0.156421000 |
| O  | -0.706992000 | -2.653988000 | 0.398176000  |
| Si | -2.007839000 | -1.661315000 | 0.767958000  |
| H  | -3.297053000 | -2.284653000 | 0.480930000  |
| O  | -1.752122000 | -0.246020000 | -0.078974000 |
| Si | -0.307022000 | 0.567627000  | 0.169123000  |
| Cr | 0.684912000  | 2.678760000  | -2.154014000 |
| O  | 1.189148000  | 2.383672000  | -3.845830000 |
| O  | -0.128007000 | 1.895476000  | -0.703967000 |
| C  | 2.810509000  | -0.527746000 | -3.184916000 |
| H  | 2.313275000  | -0.914209000 | -4.063346000 |
| H  | 3.865461000  | -0.297361000 | -3.227992000 |
| H  | 2.285787000  | -0.498643000 | -2.240524000 |
| H  | 1.884344000  | 1.770366000  | -4.114182000 |

No imaginary frequency

G(298.15 K) = -1890.1134974 a.u.

---

**<sup>6</sup>P<sub>HAT-iv</sub>**

21

---

|    |              |              |             |
|----|--------------|--------------|-------------|
| Si | -0.355302000 | -0.538637000 | 2.797082000 |
| H  | -0.264931000 | -0.227535000 | 4.221403000 |

---

---

|    |              |              |              |
|----|--------------|--------------|--------------|
| O  | 0.845860000  | -1.590706000 | 2.282570000  |
| O  | -0.223668000 | 0.810293000  | 1.819653000  |
| O  | -1.802883000 | -1.271518000 | 2.377570000  |
| Si | 0.826359000  | -2.008003000 | 0.659858000  |
| H  | 1.906057000  | -2.921005000 | 0.291796000  |
| O  | 0.881454000  | -0.561635000 | -0.181301000 |
| O  | -0.696757000 | -2.644362000 | 0.373210000  |
| Si | -1.999655000 | -1.659888000 | 0.758305000  |
| H  | -3.287826000 | -2.287697000 | 0.475840000  |
| O  | -1.757376000 | -0.238008000 | -0.083725000 |
| Si | -0.314249000 | 0.578973000  | 0.162652000  |
| Cr | 0.675707000  | 2.684375000  | -2.153946000 |
| O  | 1.206294000  | 2.317285000  | -3.827873000 |
| O  | -0.152956000 | 1.916961000  | -0.701471000 |
| C  | 2.779625000  | -0.524930000 | -3.149562000 |
| H  | 2.293397000  | -0.915411000 | -4.032097000 |
| H  | 3.836792000  | -0.303020000 | -3.178010000 |
| H  | 2.236018000  | -0.467408000 | -2.216791000 |
| H  | 1.915801000  | 1.702317000  | -4.052749000 |

No imaginary frequency

G(298.15 K) = -1890.1147676 a.u.

---

**<sup>4</sup>P<sub>PCET-iv</sub>**

21

---

|    |              |              |              |
|----|--------------|--------------|--------------|
| Si | -0.182582000 | 0.038725000  | 2.864410000  |
| H  | 0.461232000  | 0.494917000  | 4.093450000  |
| O  | 0.332401000  | -1.483522000 | 2.383241000  |
| O  | 0.101841000  | 1.045329000  | 1.559805000  |
| O  | -1.849416000 | -0.073584000 | 2.999952000  |
| Si | -0.349336000 | -2.093037000 | 0.978723000  |
| H  | 0.154147000  | -3.419377000 | 0.629677000  |
| O  | -0.052242000 | -0.946520000 | -0.203350000 |
| O  | -2.005820000 | -2.066747000 | 1.230974000  |
| Si | -2.677388000 | -0.583319000 | 1.634003000  |
| H  | -4.122718000 | -0.647944000 | 1.832811000  |
| O  | -2.226267000 | 0.464676000  | 0.411632000  |
| Si | -0.590871000 | 0.618693000  | 0.095984000  |
| Cr | 0.786301000  | 1.654824000  | -2.591361000 |
| O  | 0.434415000  | 1.162786000  | -4.251087000 |
| O  | -0.243539000 | 1.634818000  | -1.103567000 |
| C  | 2.632062000  | 1.060308000  | -2.069046000 |
| H  | 2.927532000  | 1.618883000  | -1.175766000 |
| H  | 2.613223000  | -0.006338000 | -1.837293000 |
| H  | 3.336208000  | 1.257329000  | -2.880768000 |

---

---

|   |             |             |              |
|---|-------------|-------------|--------------|
| H | 0.520816000 | 0.269099000 | -4.602425000 |
|---|-------------|-------------|--------------|

No imaginary frequency

G(298.15 K) = -1890.1725488 a.u.

---

<sup>1</sup>EC-v

58

---

|    |             |             |             |
|----|-------------|-------------|-------------|
| Si | -0.17631400 | 2.14765100  | 1.15819000  |
| O  | -1.42842500 | 3.22911500  | 1.27703900  |
| O  | -0.76765600 | 0.71911500  | 1.76206600  |
| O  | 0.05109000  | 1.91239900  | -0.46903300 |
| Si | -2.85136700 | 2.77099900  | 0.51171500  |
| O  | -3.27662100 | 1.27535200  | 1.15405200  |
| O  | -2.45034000 | 2.47974200  | -1.09847400 |
| Si | -1.24830700 | 1.36260900  | -1.34109100 |
| O  | -1.77461400 | -0.01972100 | -0.58793500 |
| Si | -2.11952000 | 0.09340300  | 1.03173500  |
| Si | 2.64373200  | 1.52869000  | 1.86389800  |
| O  | 4.09475500  | 1.97932900  | 2.63824100  |
| O  | 3.15719700  | 1.19642300  | 0.27877800  |
| O  | 2.32855300  | -0.00266100 | 2.52894200  |
| Si | 5.46454000  | 0.91913700  | 2.57679400  |
| O  | 5.68698200  | 0.63149400  | 0.87962200  |
| O  | 4.84435000  | -0.58968100 | 3.16923400  |
| Si | 3.46135300  | -1.26661700 | 2.44190900  |
| O  | 3.88742300  | -1.32789300 | 0.79744100  |
| Si | 4.37888000  | 0.06179600  | -0.04922300 |
| H  | 6.64674000  | 1.40539600  | 3.27237100  |
| O  | 1.27007000  | 2.47248700  | 1.86288300  |
| O  | -0.75857200 | 0.99379000  | -2.86439500 |
| O  | 4.46035100  | -0.24304000 | -1.68587100 |
| O  | 2.76443200  | -2.70393600 | 2.91747500  |
| O  | -2.41003700 | -1.40993600 | 1.62438900  |
| Si | -1.39352500 | -2.73083500 | 1.60081700  |
| O  | 0.07608600  | -2.38152400 | 2.37698000  |
| O  | -0.94357000 | -3.12643300 | 0.01080900  |
| O  | -1.81107800 | -4.24893800 | 2.25580700  |
| Si | 1.40229900  | -3.44164700 | 2.30399200  |
| O  | 1.58215300  | -3.75991700 | 0.64395500  |
| O  | 0.75819800  | -4.90053100 | 2.90156300  |
| Si | -0.67597800 | -5.55718100 | 2.17805100  |
| O  | -0.27745700 | -5.65756200 | 0.49166900  |
| Si | 0.27503900  | -4.26462400 | -0.31770400 |
| Si | 2.07872800  | -1.54785600 | -5.31384600 |
| O  | 0.83878000  | -0.39257600 | -4.94772500 |

---

---

|    |             |             |             |
|----|-------------|-------------|-------------|
| O  | 3.43417100  | -1.00865200 | -4.37391700 |
| O  | 1.55556400  | -2.98561700 | -4.49403600 |
| Si | 0.42094900  | -0.09195200 | -3.32185600 |
| O  | 1.91765500  | 0.29515900  | -2.61888100 |
| O  | 0.07214500  | -1.64755100 | -2.73475900 |
| Si | 1.20110300  | -2.91485200 | -2.82995900 |
| O  | 2.61931400  | -2.25239600 | -2.16722400 |
| Si | 3.24457500  | -0.76388300 | -2.69915300 |
| O  | 0.68361800  | -4.22056500 | -1.93281600 |
| H  | 2.35304900  | -1.72143400 | -6.73248000 |
| H  | -1.13952800 | -6.80472300 | 2.76677700  |
| V  | -4.96195400 | 5.39690500  | 0.73047900  |
| O  | -4.03535000 | 3.84897700  | 0.66198000  |
| O  | -4.34603100 | 6.61605600  | -0.07673700 |
| O  | -5.42237300 | 5.86439100  | 2.17562300  |
| H  | -6.83524200 | 5.93876400  | 0.02559100  |
| C  | -7.06110300 | 4.95726500  | -0.43180400 |
| H  | -7.18722700 | 5.13750400  | -1.49522200 |
| H  | -6.32733500 | 4.13974000  | -0.33030400 |
| H  | -7.97435000 | 4.61104700  | 0.04357700  |

No imaginary frequency

G(298.15 K) = -7228.29384 a.u.

---

<sup>1</sup>TS<sub>HAT-V</sub>

58

---

|    |             |             |             |
|----|-------------|-------------|-------------|
| Si | 1.88221100  | -0.78168500 | -0.38779900 |
| O  | 0.65585500  | 0.33687400  | -0.39354700 |
| O  | 1.20522800  | -2.17490800 | 0.20356600  |
| O  | 2.23739200  | -1.06150500 | -1.98199000 |
| Si | -0.72136300 | -0.10514000 | -1.27239700 |
| O  | -1.22936900 | -1.57005100 | -0.61879000 |
| O  | -0.18536500 | -0.44443000 | -2.82740900 |
| Si | 0.99674900  | -1.60045700 | -2.94577100 |
| O  | 0.37367000  | -2.94697200 | -2.20229400 |
| Si | -0.10085000 | -2.78555800 | -0.62121900 |
| Si | 4.61146100  | -1.43193000 | 0.57823700  |
| O  | 6.00291900  | -0.98914000 | 1.45835300  |
| O  | 5.24097600  | -1.81547800 | -0.95116600 |
| O  | 4.20530700  | -2.93562000 | 1.25537100  |
| Si | 7.34914200  | -2.08031300 | 1.53501600  |
| O  | 7.70059500  | -2.41443100 | -0.13089000 |
| O  | 6.64652200  | -3.55839800 | 2.11194400  |
| Si | 5.31205800  | -4.22588600 | 1.29044300  |
| O  | 5.86902900  | -4.33683200 | -0.31133400 |

---

---

|    |             |             |             |
|----|-------------|-------------|-------------|
| Si | 6.46090300  | -2.98252500 | -1.15071200 |
| H  | 8.48087000  | -1.60079300 | 2.31419900  |
| O  | 3.26455900  | -0.45714100 | 0.43811200  |
| O  | 1.60322400  | -2.02304800 | -4.41065200 |
| O  | 6.67296500  | -3.33147600 | -2.76582600 |
| O  | 4.54161400  | -5.63235700 | 1.74232600  |
| O  | -0.47593700 | -4.26376300 | -0.01368700 |
| Si | 0.50636000  | -5.60775200 | 0.08198200  |
| O  | 1.91356700  | -5.26761100 | 0.97159000  |
| O  | 1.07882800  | -6.05414400 | -1.45333800 |
| O  | 0.00041300  | -7.09775800 | 0.73941600  |
| Si | 3.21699300  | -6.35648900 | 1.03590800  |
| O  | 3.52760100  | -6.72117700 | -0.59454200 |
| O  | 2.49244400  | -7.78418700 | 1.61451800  |
| Si | 1.10833200  | -8.43089200 | 0.78998000  |
| O  | 1.64425600  | -8.58326300 | -0.85359100 |
| Si | 2.29441200  | -7.22570200 | -1.64992800 |
| Si | 4.57547500  | -4.69086800 | -6.54718900 |
| O  | 3.33567200  | -3.50151500 | -6.31544800 |
| O  | 5.85983400  | -4.15167300 | -5.51120400 |
| O  | 3.95452400  | -6.09335600 | -5.73469400 |
| Si | 2.78962600  | -3.14696300 | -4.73968400 |
| O  | 4.23110100  | -2.76992900 | -3.92276500 |
| O  | 2.35971100  | -4.67728900 | -4.14066300 |
| Si | 3.46395000  | -5.96897200 | -4.10913300 |
| O  | 4.83721600  | -5.31673800 | -3.34794500 |
| Si | 5.53620100  | -3.85682000 | -3.86583700 |
| O  | 2.84112000  | -7.23596500 | -3.22378400 |
| H  | 4.96371700  | -4.91056600 | -7.93238300 |
| H  | 0.56877200  | -9.65187000 | 1.36947100  |
| V  | -2.47218200 | 2.61553700  | -0.56869200 |
| O  | -1.85557700 | 1.03173400  | -1.21010400 |
| O  | -3.00631100 | 3.71298200  | -1.56906200 |
| O  | -1.74567900 | 3.22660600  | 0.84205100  |
| H  | -0.70754700 | 3.10834400  | 1.46221700  |
| C  | 0.45851400  | 2.90048500  | 2.03388600  |
| H  | 0.88275300  | 2.11300800  | 1.41839800  |
| H  | 0.18794000  | 2.60482000  | 3.04332000  |
| H  | 0.94618900  | 3.86725900  | 1.95415400  |

One and only one imaginary frequency: -1908.4862 cm<sup>-1</sup>  
G(298.15 K) = -7228.23294 a.u.

---

<sup>3</sup>TS<sub>HAT-V</sub>

---

|    |             |             |             |
|----|-------------|-------------|-------------|
| Si | 2.07978200  | -0.81186600 | -0.21039800 |
| O  | 0.88858600  | 0.34441100  | -0.15460500 |
| O  | 1.36765900  | -2.20201400 | 0.34651900  |
| O  | 2.38812300  | -1.04682700 | -1.82265900 |
| Si | -0.51675400 | -0.02836500 | -1.01529800 |
| O  | -1.06218500 | -1.49225600 | -0.39979400 |
| O  | -0.02883700 | -0.32425600 | -2.59423200 |
| Si | 1.11281800  | -1.51486700 | -2.77697400 |
| O  | 0.46014500  | -2.86368000 | -2.06481600 |
| Si | 0.02631100  | -2.74376200 | -0.46839600 |
| Si | 4.80796800  | -1.59226400 | 0.66389100  |
| O  | 6.23251400  | -1.22743100 | 1.52668600  |
| O  | 5.39075500  | -1.94233100 | -0.89244400 |
| O  | 4.36506200  | -3.10432100 | 1.29742100  |
| Si | 7.54156600  | -2.36565200 | 1.53588000  |
| O  | 7.84492400  | -2.65298900 | -0.14836900 |
| O  | 6.80085100  | -3.83846200 | 2.07804200  |
| Si | 5.42736200  | -4.43140500 | 1.26430800  |
| O  | 5.94599200  | -4.50498200 | -0.35235300 |
| Si | 6.56495600  | -3.14276600 | -1.15868600 |
| H  | 8.70593900  | -1.95235800 | 2.30472200  |
| O  | 3.49287200  | -0.56844000 | 0.58832900  |
| O  | 1.67126300  | -1.90539200 | -4.26896500 |
| O  | 6.72777800  | -3.44064600 | -2.78978100 |
| O  | 4.61776300  | -5.82532300 | 1.68521200  |
| O  | -0.38619400 | -4.22889000 | 0.09431700  |
| Si | 0.55022200  | -5.60862400 | 0.12058300  |
| O  | 1.98698500  | -5.34525000 | 0.98801200  |
| O  | 1.07345000  | -6.01862200 | -1.44264600 |
| O  | 0.00852000  | -7.10305400 | 0.73720000  |
| Si | 3.25364800  | -6.47896300 | 0.98569900  |
| O  | 3.51555400  | -6.79612700 | -0.66324000 |
| O  | 2.49358200  | -7.90099800 | 1.53149500  |
| Si | 1.07135600  | -8.47325500 | 0.71707100  |
| O  | 1.56596800  | -8.58539100 | -0.94261500 |
| Si | 2.24367500  | -7.22291100 | -1.70677800 |
| Si | 4.50163200  | -4.59473600 | -6.56598000 |
| O  | 3.30825600  | -3.37317400 | -6.26488500 |
| O  | 5.82551000  | -4.13465200 | -5.54185500 |
| O  | 3.85163100  | -6.00329700 | -5.78752600 |
| Si | 2.80996300  | -3.05728400 | -4.66541700 |
| O  | 4.28034500  | -2.75624000 | -3.86944200 |
| O  | 2.34113800  | -4.59218800 | -4.10956500 |
| Si | 3.40145500  | -5.92030700 | -4.14778200 |

---



---

|    |             |             |             |
|----|-------------|-------------|-------------|
| O  | 4.81188100  | -5.34037800 | -3.39648300 |
| Si | 5.54911000  | -3.88749900 | -3.88001000 |
| O  | 2.75541000  | -7.19592300 | -3.29223900 |
| H  | 4.85119700  | -4.77823700 | -7.96663100 |
| H  | 0.50362700  | -9.69526000 | 1.26662800  |
| V  | -2.60737300 | 2.63124200  | -0.64441000 |
| O  | -1.59725900 | 1.15585000  | -0.89025700 |
| O  | -3.92457800 | 2.87413100  | -1.47297100 |
| O  | -2.21294100 | 3.95387000  | 0.47261500  |
| H  | -1.01328500 | 3.65589100  | 1.15207100  |
| C  | -0.00378400 | 3.27695900  | 1.65666800  |
| H  | 0.38217400  | 2.45083200  | 1.06524400  |
| H  | -0.29312700 | 2.98186500  | 2.66246600  |
| H  | 0.63763200  | 4.15517600  | 1.63641000  |

One and only one imaginary frequency:  $-458.5206 \text{ cm}^{-1}$

G(298.15 K) =  $-7228.2254463 \text{ a.u.}$

---

**<sup>1</sup>TS<sub>PCET-V</sub>**

58

---

|    |             |             |             |
|----|-------------|-------------|-------------|
| Si | 2.02540800  | -0.80255100 | -0.45338200 |
| O  | 0.75854300  | 0.26319700  | -0.32725600 |
| O  | 1.45120300  | -2.24010000 | 0.14496700  |
| O  | 2.25181800  | -1.02635600 | -2.08187000 |
| Si | -0.65624400 | -0.21452200 | -1.09441400 |
| O  | -1.06463700 | -1.71293700 | -0.45569700 |
| O  | -0.25640000 | -0.48711300 | -2.70573100 |
| Si | 0.95944300  | -1.58926900 | -2.95609900 |
| O  | 0.44993300  | -2.97998100 | -2.20714000 |
| Si | 0.10712300  | -2.88101000 | -0.58649200 |
| Si | 4.85362100  | -1.38870400 | 0.24539600  |
| O  | 6.29966500  | -0.92345700 | 1.01994300  |
| O  | 5.36784200  | -1.70744500 | -1.34201600 |
| O  | 4.55701900  | -2.92645900 | 0.90391200  |
| Si | 7.68217400  | -1.96723000 | 0.95165000  |
| O  | 7.90493000  | -2.24443100 | -0.74709200 |
| O  | 7.08031400  | -3.48566000 | 1.53820100  |
| Si | 5.70494600  | -4.17661200 | 0.80982800  |
| O  | 6.12900000  | -4.22508800 | -0.83552100 |
| Si | 6.60278300  | -2.82606300 | -1.67683300 |
| H  | 8.85938400  | -1.46959700 | 1.64761800  |
| O  | 3.46782700  | -0.46175800 | 0.25088300  |
| O  | 1.45171900  | -1.94435600 | -4.48084100 |
| O  | 6.68560400  | -3.12280200 | -3.31473900 |
| O  | 5.02694500  | -5.62456000 | 1.28022800  |

---

---

|    |             |             |             |
|----|-------------|-------------|-------------|
| O  | -0.16353900 | -4.38927200 | 0.00037500  |
| Si | 0.86882500  | -5.69798600 | -0.03045100 |
| O  | 2.33492500  | -5.33334000 | 0.74529700  |
| O  | 1.32130700  | -6.07931100 | -1.62299800 |
| O  | 0.47053800  | -7.22342900 | 0.61819100  |
| Si | 3.67365000  | -6.37745400 | 0.66548900  |
| O  | 3.85497000  | -6.68580700 | -0.99620300 |
| O  | 3.04798700  | -7.84663600 | 1.25725600  |
| Si | 1.62108600  | -8.51790500 | 0.53260000  |
| O  | 2.01825200  | -8.60487900 | -1.15477600 |
| Si | 2.55272200  | -7.20182300 | -1.95860600 |
| Si | 4.31593900  | -4.44139900 | -6.94602100 |
| O  | 3.06280400  | -3.30231400 | -6.57341100 |
| O  | 5.66570200  | -3.88982200 | -6.00496700 |
| O  | 3.81074600  | -5.88830400 | -6.13111300 |
| Si | 2.64364200  | -3.01360800 | -4.94616200 |
| O  | 4.13604400  | -2.61112700 | -4.24253500 |
| O  | 2.31382600  | -4.57523000 | -4.36406800 |
| Si | 3.45745900  | -5.82900300 | -4.46649800 |
| O  | 4.86816100  | -5.15208900 | -3.80227700 |
| Si | 5.47529600  | -3.65430100 | -4.32911500 |
| O  | 2.95769100  | -7.14476200 | -3.57407800 |
| H  | 4.59061800  | -4.60573500 | -8.36564900 |
| H  | 1.17374700  | -9.77367600 | 1.11629100  |
| V  | -2.69603100 | 2.41192100  | -1.18285400 |
| O  | -1.85733000 | 0.85160100  | -0.93102500 |
| O  | -1.93832300 | 3.46109300  | -2.08141200 |
| O  | -3.48356300 | 3.11626700  | 0.10003600  |
| H  | -4.35562100 | 2.73258600  | -0.77860900 |
| C  | -4.66997000 | 2.10184100  | -2.04409800 |
| H  | -4.61336200 | 2.66318100  | -2.97414400 |
| H  | -4.57324000 | 1.02763200  | -2.21812800 |
| H  | -5.66483600 | 2.26219600  | -1.61630000 |

One and only one imaginary frequency: -1489.0131 cm<sup>-1</sup>

G(298.15 K) = -7228.2586742 a.u.

---

<sup>1</sup>P<sub>HAT-V</sub>

58

---

|    |             |             |             |
|----|-------------|-------------|-------------|
| Si | 1.88511200  | -0.85735300 | -0.22960500 |
| O  | 0.65544100  | 0.25950300  | -0.19375000 |
| O  | 1.21117800  | -2.27126200 | 0.31256300  |
| O  | 2.23250100  | -1.07768600 | -1.83524700 |
| Si | -0.72318100 | -0.15775000 | -1.08120400 |
| O  | -1.22642500 | -1.64136200 | -0.47710200 |

---

---

|    |             |             |             |
|----|-------------|-------------|-------------|
| O  | -0.19300600 | -0.43385500 | -2.65029800 |
| Si | 0.99053000  | -1.58526100 | -2.81360900 |
| O  | 0.37068500  | -2.95702700 | -2.11653000 |
| Si | -0.09636200 | -2.85536900 | -0.52801400 |
| Si | 4.62240900  | -1.53428100 | 0.69548800  |
| O  | 6.01469500  | -1.12033400 | 1.58739300  |
| O  | 5.24891400  | -1.85964700 | -0.84880100 |
| O  | 4.21977900  | -3.06264800 | 1.31602900  |
| Si | 7.36266600  | -2.21213100 | 1.62102900  |
| O  | 7.71047400  | -2.48595100 | -0.05692500 |
| O  | 6.66300900  | -3.71063600 | 2.14648600  |
| Si | 5.32849000  | -4.35170900 | 1.30515100  |
| O  | 5.88221500  | -4.40383600 | -0.30082200 |
| Si | 6.46842200  | -3.01905400 | -1.09276600 |
| H  | 8.49641800  | -1.75813500 | 2.41243800  |
| O  | 3.27220700  | -0.55903300 | 0.59566300  |
| O  | 1.59131500  | -1.95249100 | -4.29527800 |
| O  | 6.67030900  | -3.31101800 | -2.72055000 |
| O  | 4.56266300  | -5.77419200 | 1.71196600  |
| O  | -0.46459200 | -4.35445700 | 0.02737500  |
| Si | 0.52151600  | -5.69855000 | 0.07216100  |
| O  | 1.93081900  | -5.38730200 | 0.96850900  |
| O  | 1.09101300  | -6.08512000 | -1.48063400 |
| O  | 0.02046100  | -7.21176500 | 0.67607600  |
| Si | 3.23572700  | -6.47663100 | 0.98816300  |
| O  | 3.54193100  | -6.78193800 | -0.65543000 |
| O  | 2.51516600  | -7.92540800 | 1.51736100  |
| Si | 1.12959100  | -8.54482200 | 0.67475300  |
| O  | 1.65977500  | -8.63568200 | -0.97536300 |
| Si | 2.30536200  | -7.24942000 | -1.72396300 |
| Si | 4.55852500  | -4.53702600 | -6.53869000 |
| O  | 3.31787200  | -3.35795200 | -6.26021800 |
| O  | 5.84553500  | -4.03344900 | -5.48815300 |
| O  | 3.94200900  | -5.96874000 | -5.77553100 |
| Si | 2.77738500  | -3.06289200 | -4.67088100 |
| O  | 4.22029000  | -2.71267300 | -3.84524800 |
| O  | 2.35072800  | -4.61414500 | -4.12655000 |
| Si | 3.45724900  | -5.90442400 | -4.14460700 |
| O  | 4.83122000  | -5.27673600 | -3.36497900 |
| Si | 5.52795800  | -3.79870400 | -3.83200600 |
| O  | 2.84271900  | -7.20303700 | -3.30052700 |
| H  | 4.94128900  | -4.70583100 | -7.93252200 |
| H  | 0.59468800  | -9.78682100 | 1.21241700  |
| V  | -2.68113600 | 2.52409800  | -0.53022500 |

---

---

|   |             |            |             |
|---|-------------|------------|-------------|
| O | -1.84924500 | 0.98552500 | -0.98208500 |
| O | -4.13016600 | 2.82257600 | -1.06778700 |
| O | -1.96111500 | 3.75987700 | 0.50028700  |
| H | -1.08950800 | 3.78962400 | 0.93590100  |
| C | 0.90666400  | 3.25609000 | 1.60092900  |
| H | 0.91960200  | 2.30996100 | 1.07754800  |
| H | 0.63467400  | 3.28727100 | 2.64685900  |
| H | 1.35987500  | 4.12664600 | 1.14745400  |

No imaginary frequency

G(298.15 K) = -7228.2501506 a.u.

---

<sup>1</sup>P<sub>PCET-V</sub>

58

---

|    |             |             |             |
|----|-------------|-------------|-------------|
| Si | -0.25335200 | 2.14026600  | 1.17809400  |
| O  | -1.52179400 | 3.20401400  | 1.30893900  |
| O  | -0.81983800 | 0.70596000  | 1.79195300  |
| O  | -0.04152500 | 1.90578300  | -0.45051800 |
| Si | -2.94081800 | 2.71833000  | 0.55478400  |
| O  | -3.34145500 | 1.22622700  | 1.21230100  |
| O  | -2.55570300 | 2.43725000  | -1.05651500 |
| Si | -1.34029900 | 1.33485700  | -1.31023600 |
| O  | -1.84206000 | -0.05052000 | -0.54589100 |
| Si | -2.16948000 | 0.05829500  | 1.07685800  |
| Si | 2.58147700  | 1.56400600  | 1.85722200  |
| O  | 4.03318900  | 2.03703500  | 2.61623100  |
| O  | 3.08250500  | 1.23438300  | 0.26803100  |
| O  | 2.29219100  | 0.03091900  | 2.52977600  |
| Si | 5.41655700  | 0.99446200  | 2.54366600  |
| O  | 5.62516300  | 0.70486900  | 0.84532500  |
| O  | 4.82137400  | -0.52017200 | 3.14679000  |
| Si | 3.44109100  | -1.21842200 | 2.43507300  |
| O  | 3.85102600  | -1.27833000 | 0.78665900  |
| Si | 4.31600800  | 0.11479700  | -0.06931600 |
| H  | 6.59892500  | 1.49902900  | 3.22576400  |
| O  | 1.19407300  | 2.48881400  | 1.86811900  |
| O  | -0.86004600 | 0.96879800  | -2.83570700 |
| O  | 4.38486800  | -0.19422200 | -1.70541400 |
| O  | 2.76952900  | -2.66369500 | 2.92277600  |
| O  | -2.43303100 | -1.44534200 | 1.67820200  |
| Si | -1.39885200 | -2.75283300 | 1.64793500  |
| O  | 0.07291300  | -2.38056000 | 2.40927900  |
| O  | -0.95872600 | -3.14436400 | 0.05465500  |
| O  | -1.78982100 | -4.27384500 | 2.31104500  |
| Si | 1.41239800  | -3.42354300 | 2.32521800  |

---

---

|    |             |             |             |
|----|-------------|-------------|-------------|
| O  | 1.58053600  | -3.74357700 | 0.66444300  |
| O  | 0.79348100  | -4.88914300 | 2.93298400  |
| Si | -0.63826500 | -5.56749700 | 2.22475600  |
| O  | -0.25502400 | -5.66562700 | 0.53500200  |
| Si | 0.27102300  | -4.26800900 | -0.28370900 |
| Si | 1.98685800  | -1.54272900 | -5.30711300 |
| O  | 0.73544800  | -0.40258300 | -4.93215700 |
| O  | 3.34363700  | -0.98260800 | -4.38104600 |
| O  | 1.49031700  | -2.98408400 | -4.47706000 |
| Si | 0.32915300  | -0.10226300 | -3.30395900 |
| O  | 1.82672700  | 0.30717200  | -2.61521000 |
| O  | 0.00622800  | -1.65990500 | -2.70729900 |
| Si | 1.15070400  | -2.91281900 | -2.81022100 |
| O  | 2.56586500  | -2.22937400 | -2.16245100 |
| Si | 3.16668300  | -0.73480600 | -2.70562800 |
| O  | 0.66125500  | -4.22239400 | -1.90297800 |
| H  | 2.24998800  | -1.71743600 | -6.72766100 |
| H  | -1.07888300 | -6.81953400 | 2.82144200  |
| V  | -4.97096700 | 5.30849100  | 0.34702600  |
| O  | -4.14670500 | 3.78140200  | 0.72798000  |
| O  | -4.12440400 | 6.31247500  | -0.50332900 |
| O  | -5.72767700 | 6.14681300  | 1.69749500  |
| H  | -6.15676100 | 5.68071300  | 2.42708900  |
| C  | -6.47900300 | 4.79294000  | -0.88185500 |
| H  | -7.03629000 | 5.68326800  | -1.17622900 |
| H  | -6.04210300 | 4.32093800  | -1.76528500 |
| H  | -7.12830500 | 4.08792900  | -0.35612800 |

No imaginary frequency

G(298.15 K) = -7228.3159731 a.u.

---
